# Supplementary material for: Sexualized drug injection among men who have sex with men in Madrid and Barcelona as the first episode of drug injecting
Source: Harm Reduct J. 2021 Aug 6;18:86. doi: 10.1186/s12954-021-00531-2 (PMC8344139; doi:10.1186/s12954-021-00531-2)
Supplement: Supplementary file 1 — Additional file 1. Equivalence of original questions and variables used in the analysis. [file 12954_2021_531_MOESM1_ESM.pdf]

Annex 1: Original variables and categories from table 1, as they were collected in the questionnaire and their corresponding variables and categories as they have been employed in the analysis. (I)

| Original form of variables and categories as used in the questionnaire | Variables and categories employed in the analysis |
|------------------------------------------------------------------------|---------------------------------------------------|
|------------------------------------------------------------------------|---------------------------------------------------|

### Recruitment

| City of testing | City of testing |
|-----------------|-----------------|
| Barcelona       | Barcelona       |
| Madrid          | Madrid          |

| Kind of testing program               | Kind of testing program |
|---------------------------------------|-------------------------|
| Centro Sanitario Sandoval             | STI diagnostic center   |
| UITS Drassanes                        |                         |
| Pink Peace program                    | Community program       |
| Agencia de Salud Pública de Barcelona |                         |

### Sociodemographics

| Age (years)         | Age (years) |
|---------------------|-------------|
| Continuous variable | ≤ 24        |
|                     | 25-39       |
|                     | ≥ 40        |

| Country of birth | Country of birth |
|------------------|------------------|
| Open answer      | Spain            |
|                  | Latin-America    |
|                  | Others           |

| Years residing in Spain (for those born outside of Spain) | Years residing in Spain (for those born outside of Spain) |
|-----------------------------------------------------------|-----------------------------------------------------------|
| Open answer                                               | ≤ 1                                                       |
|                                                           | 2-4                                                       |
|                                                           | ≥ 5                                                       |

| Size of city of residence (last 12 months) | Size of city of residence (last 12 months) |
|--------------------------------------------|--------------------------------------------|
| Less than 10 thousand                      | ≤ 100.000                                  |
| More than 10 thousand                      |                                            |
| More than 50 thousand                      |                                            |
| More than 100 thousand                     | 100.000 - 1 million                        |
| More than 500 thousand                     |                                            |
| More than a million                        | > 1 million                                |

| Level of education                                                                                                                                                                                                                                                                 | Level of education    |
|------------------------------------------------------------------------------------------------------------------------------------------------------------------------------------------------------------------------------------------------------------------------------------|-----------------------|
| None or primary education (the level that should be finished at 12 years of age)                                                                                                                                                                                                   | Up to upper secondary |
| Lower secondary or second stage of Basic education: designed to complete Basic education, usually following a more subject-oriented pattern (the level that should be finished at 16 years of age)                                                                                 |                       |
| (upper) secondary education: more specialized education typically beginning at age 15 or 16 years and/or the end of compulsory education (the level that should be finished at 18 years of age)                                                                                    | Post secondary        |
| Post-secondary, non-tertiary education: captures programs that straddle the Boundary between upper- and post-secondary education from an International point of view as pre-university courses of short vocational programs (the level that should be finished at 20 years of age) |                       |
| Higher education university education: specific vocational training, first and second university degrees, Bachelor, Master degree, Doctorate (PhD)                                                                                                                                 | University            |

| Employment status (last 12 months)      | Employment status (last 12 months) |
|-----------------------------------------|------------------------------------|
| Employed full-time                      | Employed                           |
| Employed part-time                      |                                    |
| Self-employed                           |                                    |
| Unemployed (with or without subsidy)    | Unemployed                         |
| Student                                 | Others                             |
| Long-term sick leave/ medically retired |                                    |
| Retired                                 |                                    |

| Economic situation (last 12 months)         | Economic situation (last 12 months) |
|---------------------------------------------|-------------------------------------|
| Very comfortable                            | Comfortable/ It is OK               |
| Comfortable, it is all right                |                                     |
| It is tight, I need to be careful           | Tight                               |
| I make ends meet with difficulties          | Difficult/Very difficult            |
| I am unable to make ends meet without debt. |                                     |

| Cohabitation (last 12 months) | Cohabitation (last 12 months) |
|-------------------------------|-------------------------------|
| Alone                         | Alone                         |
| With some people              | With some people              |

### Sexual and risk behavior

| You have ever had sex with....                      | Gender of sex partners (ever) |
|-----------------------------------------------------|-------------------------------|
| Only with men                                       | Only men                      |
| More often with men, but at least once with a woman | Men & women                   |
| About equally often with men and with women         |                               |
| More often with women, but at least once with a man |                               |

| Age at first sexual intercourse with another men (years) | Age at first sexual intercourse with another men (years) |
|----------------------------------------------------------|----------------------------------------------------------|
| Continuous variable                                      | < 16                                                     |
|                                                          | 16-20                                                    |
|                                                          | 21-24                                                    |
|                                                          | ≥ 25                                                     |

Annex 2: Original variables and categories from table 1, as they were collected in the questionnaire and their corresponding variables and categories as they have been employed in the analysis. (II)

| Original form of variables and categories as used in the questionnaire                                                                                                                                  | Variables and categories employed in the analysis            |
|---------------------------------------------------------------------------------------------------------------------------------------------------------------------------------------------------------|--------------------------------------------------------------|
| Sexual and risk behavior                                                                                                                                                                                |                                                              |
| <b>You live sex-life with men...</b>                                                                                                                                                                    | <b>Lives sex-life with men...</b>                            |
| In total secrecy                                                                                                                                                                                        | Not Openly                                                   |
| Hidden                                                                                                                                                                                                  |                                                              |
| Discreetly                                                                                                                                                                                              |                                                              |
| Openly                                                                                                                                                                                                  | Openly                                                       |
| <b>Place where you met the largest number of partners</b>                                                                                                                                               | <b>Place where the largest number of partners were met</b>   |
| Discotheques, clubs and gay bars                                                                                                                                                                        | Discos/clubs/bars                                            |
| Saunas                                                                                                                                                                                                  | Saunas                                                       |
| Apps                                                                                                                                                                                                    | Apps/websites                                                |
| Internet                                                                                                                                                                                                |                                                              |
| Parks, public restrooms, and other places for flirting or "cruising"                                                                                                                                    | Cruising places                                              |
| A sex party in a private home                                                                                                                                                                           | Private parties                                              |
| Sex Clubs                                                                                                                                                                                               | Others/no search                                             |
| Dark Rooms, sex shops                                                                                                                                                                                   |                                                              |
| Other: specify                                                                                                                                                                                          |                                                              |
| <b>Place where you met the largest number of partners</b>                                                                                                                                               | <b>Place where the largest number of partners were found</b> |
| Discotheques, clubs and gay bars                                                                                                                                                                        | Others                                                       |
| Saunas                                                                                                                                                                                                  |                                                              |
| Apps                                                                                                                                                                                                    |                                                              |
| Internet                                                                                                                                                                                                |                                                              |
| Parks, public restrooms, and other places for flirting or "cruising"                                                                                                                                    |                                                              |
| Other: specify                                                                                                                                                                                          |                                                              |
| Sex Clubs                                                                                                                                                                                               |                                                              |
| Dark Rooms, sex shops                                                                                                                                                                                   |                                                              |
| A sex party in a private home                                                                                                                                                                           | Private parties                                              |
| <b>Number of men penetrated by (ever)</b>                                                                                                                                                               | <b>Number of men penetrated by (ever)</b>                    |
| None                                                                                                                                                                                                    | None                                                         |
| One                                                                                                                                                                                                     | 1-49                                                         |
| Less than 5                                                                                                                                                                                             |                                                              |
| Less than 10                                                                                                                                                                                            |                                                              |
| Less than 20                                                                                                                                                                                            |                                                              |
| Less than 50                                                                                                                                                                                            |                                                              |
| Less than 100                                                                                                                                                                                           |                                                              |
| Less than 200                                                                                                                                                                                           | ≥ 50                                                         |
| More than 200                                                                                                                                                                                           |                                                              |
| <b>Number of men penetrated by (last 12 months)</b>                                                                                                                                                     | <b>Number of men penetrated by (last 12 months)</b>          |
| None                                                                                                                                                                                                    | None                                                         |
| One                                                                                                                                                                                                     | ≤5                                                           |
| Less than 5                                                                                                                                                                                             |                                                              |
| Less than 10                                                                                                                                                                                            |                                                              |
| Less than 20                                                                                                                                                                                            |                                                              |
| Less than 50                                                                                                                                                                                            |                                                              |
| Less than 100                                                                                                                                                                                           |                                                              |
| Less than 200                                                                                                                                                                                           | >5                                                           |
| More than 200                                                                                                                                                                                           |                                                              |
| <b>Number of men who have ever paid you for sex / Occurrence of last episode</b>                                                                                                                        | <b>Been paid for sex</b>                                     |
| None                                                                                                                                                                                                    | Never                                                        |
| One                                                                                                                                                                                                     | Last 12 months                                               |
| Less than 5                                                                                                                                                                                             |                                                              |
| Less than 10                                                                                                                                                                                            |                                                              |
| Less than 20                                                                                                                                                                                            |                                                              |
| Less than 50                                                                                                                                                                                            | > 12 months ago                                              |
| Less than 100                                                                                                                                                                                           |                                                              |
| More than 100                                                                                                                                                                                           |                                                              |
| <div>When was the last time?</div> <div><div>In the last month</div><div>In the last 6 months</div><div>In the last 12 months</div><div>In the last 5 years</div><div>More than 5 years ago</div></div> |                                                              |
| <b>Number of men you have ever paid for sex / Occurrence of last episode</b>                                                                                                                            | <b>Paid for sex</b>                                          |
| None                                                                                                                                                                                                    | Never                                                        |
| One                                                                                                                                                                                                     | Last 12 months                                               |
| Less than 5                                                                                                                                                                                             |                                                              |
| Less than 10                                                                                                                                                                                            |                                                              |
| Less than 20                                                                                                                                                                                            |                                                              |
| Less than 50                                                                                                                                                                                            | > 12 months ago                                              |
| Less than 100                                                                                                                                                                                           |                                                              |
| More than 100                                                                                                                                                                                           |                                                              |
| <div>When was the last time?</div> <div><div>In the last month</div><div>In the last 6 months</div><div>In the last 12 months</div><div>In the last 5 years</div><div>More than 5 years ago</div></div> |                                                              |
| <b>Ever injected steroids</b>                                                                                                                                                                           | <b>Ever injected steroids</b>                                |
| No                                                                                                                                                                                                      | No                                                           |
| Yes                                                                                                                                                                                                     | Yes                                                          |

Annex 3: Original variables and categories from table 1, as they were collected in the questionnaire and their corresponding variables and categories as they have been employed in the analysis. (III)

| Original form of variables and categories as used in the questionnaire |  | Variables and categories employed in the analysis |  |
|------------------------------------------------------------------------|--|---------------------------------------------------|--|
| History of HIV and other STI testing                                   |  |                                                   |  |
| Number of previous HIV tests / Occurrence of last HIV testing episode  |  | Time since last HIV test                          |  |
| Never                                                                  |  | Never                                             |  |
| Once                                                                   |  |                                                   |  |
| 2 times                                                                |  |                                                   |  |
| 3 to 5 times                                                           |  |                                                   |  |
| 6 to 9 times                                                           |  |                                                   |  |
| 10 to 15 times                                                         |  |                                                   |  |
| 16 to 20 times                                                         |  |                                                   |  |
| More than 20 times                                                     |  |                                                   |  |
| When was the last time?                                                |  |                                                   |  |
| In the last month                                                      |  |                                                   |  |
| In the last 6 months                                                   |  |                                                   |  |
| In the last 12 months                                                  |  | Last 12 months                                    |  |
| In the last 5 years                                                    |  |                                                   |  |
| More than 5 years ago                                                  |  | > 12 months ago                                   |  |
| HIV new diagnosis in this consultation                                 |  | HIV new diagnosis in this consultation            |  |
| Based on the result of the HIV test                                    |  | No                                                |  |
|                                                                        |  | Yes                                               |  |
| STI diagnosis (ever)                                                   |  | STI diagnosis (ever)                              |  |
| None                                                                   |  | No                                                |  |
| Syphilis                                                               |  |                                                   |  |
| Gonorrhoea                                                             |  |                                                   |  |
| Chlamydia                                                              |  |                                                   |  |
| Lymphogranuloma venereum                                               |  |                                                   |  |
| Anal or genital warts                                                  |  |                                                   |  |
| Genital or anal herpes                                                 |  |                                                   |  |

|                                                                                                                                                                                                       |                                         |
|-------------------------------------------------------------------------------------------------------------------------------------------------------------------------------------------------------|-----------------------------------------|
| Annex 4: Original variables and categories from table 3, as they were collected in the questionnaire and their corresponding variables and categories as they have been employed in the analysis. (I) |                                         |
| Original form of variables and categories as used in the questionnaire                                                                                                                                | Categories grouped for analysis         |
| <b>First injection</b>                                                                                                                                                                                |                                         |
| <b>Age</b>                                                                                                                                                                                            | <b>Age</b>                              |
| Continuous variable                                                                                                                                                                                   | median (1-3 IQR)                        |
| <b>Years since first injection</b>                                                                                                                                                                    | <b>Years since first injection</b>      |
| Difference between current age and age of first injection                                                                                                                                             | ≤3                                      |
|                                                                                                                                                                                                       | >3                                      |
| <b>Who performed the injection</b>                                                                                                                                                                    | <b>Who performed the injection</b>      |
| Oneself                                                                                                                                                                                               | Self                                    |
| Other person                                                                                                                                                                                          | Other person                            |
| <b>Who was the injector</b>                                                                                                                                                                           | <b>Who was the injector</b>             |
| Stable sexual partner                                                                                                                                                                                 | Stable partner                          |
| Casual sexual partner                                                                                                                                                                                 | Casual partner                          |
| Brother                                                                                                                                                                                               | Friend/acquaintance                     |
| Another relative                                                                                                                                                                                      |                                         |
| Very close friend                                                                                                                                                                                     |                                         |
| Dealer                                                                                                                                                                                                |                                         |
| Casual acquaintance                                                                                                                                                                                   |                                         |
| Others. Specify:                                                                                                                                                                                      |                                         |
| <b>Drug injected</b>                                                                                                                                                                                  | <b>Drug injected</b>                    |
| Powdered or crack cocaine (theme, lighthouse, base, basuco, etc.)                                                                                                                                     | Cocaine                                 |
| Heroin (horse) or other opium-derived drugs (poppy straw, liquid heroin, acetylated opium, fentanyl, methadone or others)                                                                             | Heroine or other opioids                |
| Anphetamine (speed)                                                                                                                                                                                   | Anphetamine (speed)                     |
| MDMA (M, crystal) in its crystalline form or in its powder form                                                                                                                                       | MDMA                                    |
| Methamphetamine (bathtub, crystal meth, T)                                                                                                                                                            | Metamphetamine                          |
| Mephedrone (mefe) or other different synthetic stimulants (bath salts, methoxetamine/MXE, methylone/3MMC, methylethcathinone/4MEC, fluoroamphetamine/light ecstasy/4FA)                               | Mephedrone                              |
| Ketamine (K, keta, kei)                                                                                                                                                                               | Ketamine (K, keta, kei)                 |
| Others of which I don't know the name or specify                                                                                                                                                      | Others                                  |
| <b>Lifetime injection</b>                                                                                                                                                                             |                                         |
| <b>Number of days with an injection</b>                                                                                                                                                               | <b>Number of days with an injection</b> |
| One                                                                                                                                                                                                   | 1                                       |
| Less than 5                                                                                                                                                                                           | 2-4                                     |
| Less than 10                                                                                                                                                                                          | 5-19                                    |
| Less than 20                                                                                                                                                                                          |                                         |
| Less than 50                                                                                                                                                                                          |                                         |
| Less than 100                                                                                                                                                                                         | ≥20                                     |
| More than 100                                                                                                                                                                                         |                                         |
| <b>Last injection</b>                                                                                                                                                                                 | <b>Last injection</b>                   |
| In the last month                                                                                                                                                                                     | Last month                              |
| In the last 6 months                                                                                                                                                                                  | Last 6 months                           |
| In the last 12 months                                                                                                                                                                                 | Last 12 months                          |
| In the last 5 years                                                                                                                                                                                   | >12 months                              |
| More than 5 years ago                                                                                                                                                                                 |                                         |
| <b>Drugs ever injected</b>                                                                                                                                                                            | <b>Drugs ever injected</b>              |
| Powdered or crack cocaine (theme, lighthouse, base, basuco, etc.)                                                                                                                                     | Cocaine                                 |
| Heroin (horse) or other opium-derived drugs (poppy straw, liquid heroin, acetylated opium, fentanyl, methadone or others)                                                                             | Heroine or other opioids                |
| Anphetamine (speed)                                                                                                                                                                                   | Anphetamine                             |
| MDMA (M, crystal) in its crystalline form or in its powder form                                                                                                                                       | MDMA                                    |
| Methamphetamine (bathtub, crystal meth, T)                                                                                                                                                            | Metamphetamine                          |
| Mephedrone (mefe) or other different synthetic stimulants (bath salts, methoxetamine/MXE, methylone/3MMC, methylethcathinone/4MEC, fluoroamphetamine/light ecstasy/4FA)                               | Mephedrone                              |
| Ketamine (K, keta, kei)                                                                                                                                                                               | Ketamine                                |
| Others of which I don't know the name or specify                                                                                                                                                      | Others                                  |

Annex 5: Original variables and categories from table 3, as they were collected in the questionnaire and their corresponding variables and categories as they have been employed in the analysis. (II)

| Original form of variables and categories as used in the questionnaire |  | Categories grouped for analysis     |  |
|------------------------------------------------------------------------|--|-------------------------------------|--|
| Sharing drug or injection equipment                                    |  |                                     |  |
| Ever shared                                                            |  | Ever shared                         |  |
| No                                                                     |  | No                                  |  |
| Yes                                                                    |  | Yes                                 |  |
| Last time shared                                                       |  | Last time shared                    |  |
| In the last month                                                      |  | Last month                          |  |
| In the last 6 months                                                   |  | Last 6 months                       |  |
| In the last 12 months                                                  |  | More than six months                |  |
| In the last 5 years                                                    |  |                                     |  |
| More than 5 years ago                                                  |  |                                     |  |
| With how many people                                                   |  | With how many people                |  |
| One                                                                    |  | 1                                   |  |
| Less than 5                                                            |  | 2-4                                 |  |
| Less than 10                                                           |  | ≥5                                  |  |
| Less than 20                                                           |  |                                     |  |
| Less than 50                                                           |  |                                     |  |
| More than 50                                                           |  |                                     |  |
| Proportion with whom they shared with the purpose of having sex        |  | Proportion with they shared for sex |  |
| All                                                                    |  | All                                 |  |
| More than half                                                         |  | Not all                             |  |
| Half                                                                   |  |                                     |  |
| Less than half                                                         |  |                                     |  |
| None                                                                   |  |                                     |  |
